# Supplementary material for: Evaluation of Avian Reovirus S1133 Vaccine Strain in Neonatal Broiler Chickens in Gastrointestinal Integrity and Performance in a Large-Scale Commercial Field Trial
Source: MDPI journal article supplement (doi:10.3390/vaccines9080817), 2021-07-23
Supplement: s1 [file s1]

**Table S1.** Ingredient composition (kg) and nutrient content of the phases of feed supplied to the experimental female broiler chickens.

| Ingredients                                                                             | Pre-starter<br>1–7 days | Starter<br>8–20 days | Grower<br>21–30 days | Finisher<br>31 days to harvest |
|-----------------------------------------------------------------------------------------|-------------------------|----------------------|----------------------|--------------------------------|
| White corn 8.00%                                                                        |                         |                      | 676                  | 694                            |
| Yellow corn 7.83%                                                                       | 559.5                   | 613.5                |                      |                                |
| Soybean meal 46.5%                                                                      | 385                     | 335                  | 273.5                | 258.5                          |
| Vegetable oil                                                                           | 16                      | 16                   | 17                   | 17                             |
| Limestone 38% Ca                                                                        | 7.219                   | 7.585                | 5.125                | 4.235                          |
| Mono-di calcium phosphate 21% P, 18% Ca                                                 | 11.0                    | 8.5                  | 7.0                  | 6.0                            |
| Aluminosilicate                                                                         |                         |                      | 3.0                  | 3.0                            |
| Liquid L-lysine 50% (ADM, Chicago, IL, USA)                                             | 3.500                   | 3.300                | 3.900                | 3.800                          |
| Methionine hydroxy analog 88% (ALIMET 88®, Novus International, Saint Charles, MO, USA) | 3.700                   | 3.300                | 2.800                | 2.800                          |
| NaCl (refined salt)                                                                     | 3.900                   | 3.500                | 3.100                | 3.100                          |
| Sodium bicarbonate                                                                      | 1.300                   | 1.300                | 1.500                | 1.500                          |
| Vitamin premix (Chicken AQ V1, Trouw Nutrition, Zapopan, Jal. Mexico)                   | 1.200                   | 1.000                | 1.000                | 0.850                          |
| Organic Zinc and Manganese (Avalia®Z/M, Zinpro Corp., Eden Prairie, MN, USA)            | 1.0                     | 1.0                  |                      |                                |
| Organic aluminosilicate (Zeotek® (Sanfer, Alvaro Obregon, Mexico City, Mexico)          | 1.0                     | 0.8                  | 0.50                 | 0.50                           |
| Carboxylic acid premix (Sal Plus Ultra Polvo®, CFS Dresen, Urbandale, IA, USA)          | 1.0                     | 1.0                  | 1.0                  | 1.0                            |
| Sodium butyrate 92% (Gustor B-92® Norel, Madrid - España)                               | 1.0                     |                      |                      |                                |
| Mineral premix [19]                                                                     | 0.800                   | 0.800                | 0.800                | 0.800                          |
| L-Threonine (ThreAMINO®, Evonik, Essen, Germany)                                        | 0.750                   | 0.800                | 1.000                | 0.800                          |
| β-Mannanase (CIBENZA DE200® Novus International, Inc., St. Louis, MO, USA)              | 0.500                   | 0.500                | 0.500                | 0.500                          |
| Salinomycin 12% (Coxistac® 12%, Phibro Animal Health Corp., Teaneck, NJ, USA)           |                         |                      | 0.600                | 0.00                           |
| Biocholine Conjugated (BioCholine Powder®, Nuproxa, LTD, Switzerland)                   | 0.666                   | 0.500                | 0.460                | 0.400                          |
| Nicarbazin 25% (Avicarb®, Phibro Animal Health Corp., Teaneck, NJ, USA)                 |                         | 0.650                |                      |                                |
| Lithic cycle bacteriophages (eXolution® Bacteriophage F. CTCBio®, Seoul, South Korea)   | 0.500                   | 0.500                | 0.500                | 0.500                          |
| Organic Zinc (Avalia®Zn 120, Zinpro Corporation, Eden Prairie, MN, USA)                 |                         |                      | 0.25                 | 0.25                           |
| Protease (Poultry Grow 250®, Jefe Nutrition Inc., Saint-Hyacinthe, Canada)              | 0.125                   | 0.125                | 0.125                | 0.125                          |
| Colistin sulfate 4% (Colimix® virbac, Westlake, TX, USA)                                | 0.250                   | 0.250                | 0.250                | 0.250                          |
| 6-Phytase (Axta PHY TPT 10000®, Dupont Industrial Biosciences, Marlborough, UK)         | 0.050                   | 0.050                | 0.050                | 0.050                          |
| Virginiamycin 50% (Stafac® 500, Phibro Animal Health Corp., Teaneck, NJ, USA)           | 0.040                   | 0.040                | 0.040                | 0.040                          |
| <b>Nutrients</b>                                                                        |                         |                      |                      |                                |
| Weight                                                                                  | 1.0                     | 1.0                  | 1.0                  | 1.0                            |
| Dry matter (%)                                                                          | 88.30                   | 88.35                | 88.52                | 88.50                          |
| Crude protein (%)                                                                       | 23.000                  | 20.900               | 19.000               | 18.500                         |
| Total lysine (%)                                                                        | 1.450                   | 1.300                | 1.170                | 1.130                          |
| Methionine total (%)                                                                    | 0.660                   | 0.600                | 0.540                | 0.530                          |
| Methionine + cystine (%)                                                                | 1.040                   | 0.960                | 0.880                | 0.860                          |
| Total tryptophan (%)                                                                    | 0.285                   | 0.256                | 0.215                | 0.206                          |
| Threonine total (%)                                                                     | 0.945                   | 0.880                | 0.805                | 0.767                          |
| Metabolizable energy (Mcal kg <sup>-1</sup> )                                           | 3.040                   | 3.100                | 3.210                | 3.230                          |
| Crude fat (%)                                                                           | 4.300                   | 4.500                | 5.600                | 5.600                          |
| Total calcium (%)                                                                       | 0.950                   | 0.900                | 0.800                | 0.700                          |
| Total phosphorus (%)                                                                    | 0.61                    | 0.55                 | 0.50                 | 0.47                           |
| Phosphorus available (%)                                                                | 0.500                   | 0.450                | 0.400                | 0.390                          |
| Total chlorine (%)                                                                      | 0.260                   | 0.240                | 0.220                | 0.220                          |
| Total sodium (%)                                                                        | 0.200                   | 0.185                | 0.180                | 0.180                          |
| Total potassium (%)                                                                     | 1.000                   | 0.942                | 0.735                | 0.742                          |
| Mineral materials (%)                                                                   | 5.80                    | 5.60                 | 5.35                 | 5.22                           |
| Linoleic acid (%)                                                                       | 2.20                    | 2.25                 | 2.44                 | 2.57                           |
| Crude fiber (%)                                                                         | 2.60                    | 2.60                 | 2.50                 | 2.49                           |

**Table S2.** Feeding phase costs and cost breakdown of experimental female broilers.

| Feed cost                                        | %   | USD•chick <sup>-1</sup> | Pre-starter<br>1–7 days | Starter<br>8–20 days | Grower<br>21–30 days | Finisher<br>31 days to harvest |
|--------------------------------------------------|-----|-------------------------|-------------------------|----------------------|----------------------|--------------------------------|
| Cost by feed phase (USD•1,000 kg <sup>-1</sup> ) |     |                         | \$495.00                | \$485.15             | \$449.87             | \$445.17                       |
| Consumption per chicken per feed pase (g)        |     |                         | 190                     | 810                  | 1,000                | 705                            |
| Cost breakdown                                   |     |                         |                         |                      |                      |                                |
| Feed                                             | 61  |                         |                         |                      |                      |                                |
| Chick                                            | 16  |                         |                         |                      |                      |                                |
| Marketing, sales, and distribution               | 7   |                         |                         |                      |                      |                                |
| Labor                                            | 6   |                         |                         |                      |                      |                                |
| Electricity, water, and gas                      | 6   |                         |                         |                      |                      |                                |
| Medication                                       | 2   |                         |                         |                      |                      |                                |
| Other                                            | 2   |                         |                         |                      |                      |                                |
| Total                                            | 100 |                         |                         |                      |                      |                                |
| Reovirus vaccine to S1133ARV group               |     | \$0.0102                |                         |                      |                      |                                |
